# Supplementary material for: Sodium caprylate improves intestinal mucosal barrier function and antioxidant capacity by altering gut microbial metabolism
Source: Royal Society of Chemistry journal article supplement (doi:10.1039/d1fo01975a), 2021-01-01

**Supplementary Table 1. Nutritional composition of basal diet (g/kg, as-fed basis)<sup>1</sup>**

| Ingredients                           | Content |
|---------------------------------------|---------|
| Casein, 80 Mesh                       | 189.6   |
| L-Cystine                             | 2.8     |
| Corn Starch                           | 298.6   |
| Maltodextrin 10                       | 33.2    |
| Sucrose                               | 331.8   |
| Cellulose, BW200                      | 47.4    |
| Soybean Oil                           | 23.7    |
| Lard                                  | 19.0    |
| Mineral Mix M1002                     | 9.5     |
| Dicalcium Phosphate                   | 12.3    |
| Calcium Carbonate                     | 5.2     |
| Potassium Citrate, 1 H <sub>2</sub> O | 15.6    |
| Vitamin Mix V10001                    | 9.5     |
| Choline Bitartrate                    | 1.8     |
| Total                                 | 1000    |
| Nutrient levels, % <sup>2</sup>       |         |
| Protein                               | 19.2    |
| Carbohydrate                          | 67.3    |
| Fat                                   | 4.3     |
| Energy, kcal/g                        | 3.85    |

Note: <sup>1</sup>Formulated by E. A. Ulman, Ph.D., Research Diets, Inc., 8/26/98 and 3/11/99.

**Supplementary Figure 1. Cell viability of IPEC-J2 after different incubation time with different concentrations of H<sub>2</sub>O<sub>2</sub>, sodium caprylate and sodium butyrate. (A)**

H<sub>2</sub>O<sub>2</sub> treatment to IPEC-J2. **(B)** Sodium caprylate treatment to IPEC-J2. **(C)** Sodium butyrate treatment to IPEC-J2. IPEC-J2 cells were treated by different concentrations of 0.1, 0.3, 0.5, 0.7, 0.9, 1.1 and 1.3 µmol/L H<sub>2</sub>O<sub>2</sub> for 4 h were used to select an optimal treatment concentration and time points. At last, IPEC-J2 cells were treated with 0.7

$\mu\text{mol/L}$   $\text{H}_2\text{O}_2$  for 4 h to establish the oxidative damage model of the cells. Generally, 0.1, 0.5, 1, 2, and 5 mmol/L of sodium caprylate and sodium butyrate were used to select an optimal treatment concentration according to cell viability of IPEC-J2, and finally 0.5 mmol/L of sodium caprylate and 0.5 mmol/L of sodium butyrate were implemented to treatment normal IPEC-J2 for 24 h to determine expression of tight junction proteins. \* $P < 0.05$ , \*\* $P < 0.01$ , and \*\*\* $P < 0.001$ , compared with untreated control cells

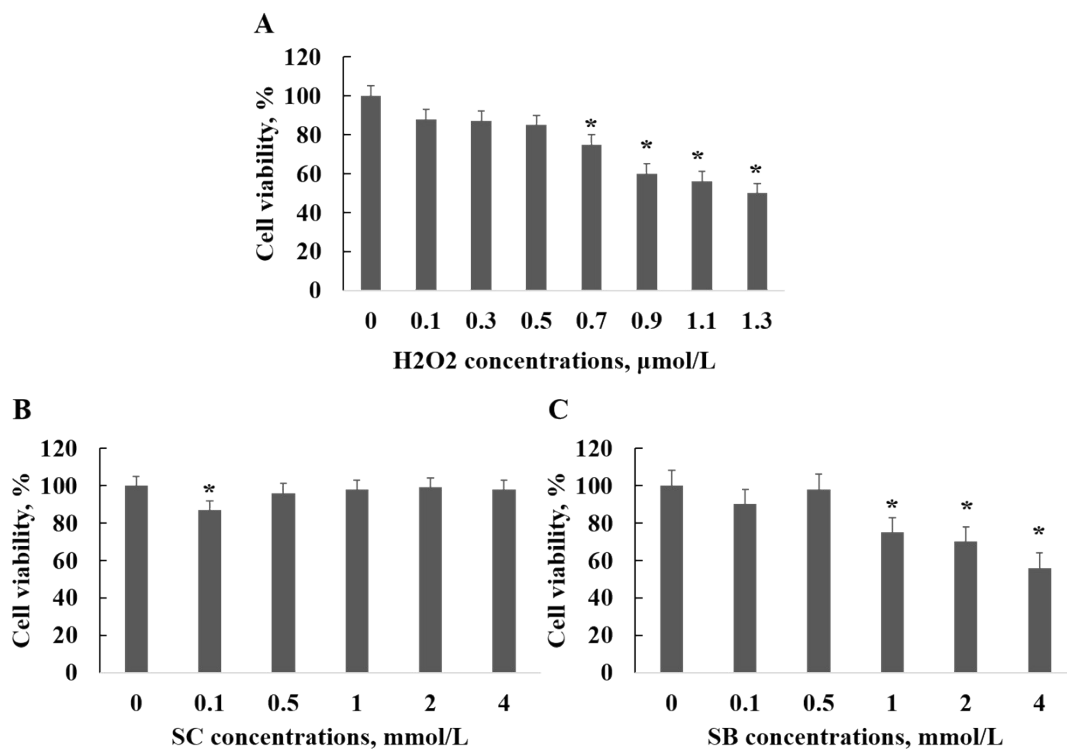

**Supplementary Figure 2.** The  $\alpha$ -diversity and similarity of intestinal bacterial community of C57/BL6 mice fed different diets. **(A)** Sobs-Wiener curves of intestinal microbiome of mice are shown. **(B)** Core analysis on the OUT level. Chao 1 value was taken to estimate the bacterial richness in the jejunum **(C)**, ileum **(D)** and colon **(E)**. Shannon index was used to estimate the bacterial richness in the jejunum **(F)**, ileum **(G)** and colon **(H)**. The Enterotype analysis **(I)** and the partial least squares discriminant analysis (PLS-DA) **(J)** were used to highlight systematic differences of bacterial

community structure among three groups. NC-J, SC-J and PC-J are jejunal content samples of mice fed with NC (basal diet), SC (basal diet with 0.5% sodium caprylate) and PC (basal diet with 0.5% sodium butyrate) diets, respectively; NC-I, SC-I and PC-I are ileal content samples of mice fed with NC, SC and PC diets, respectively; NC-C, SC-C and PC-C are colonic content samples of mice fed with NC, SC and PC diets, respectively.

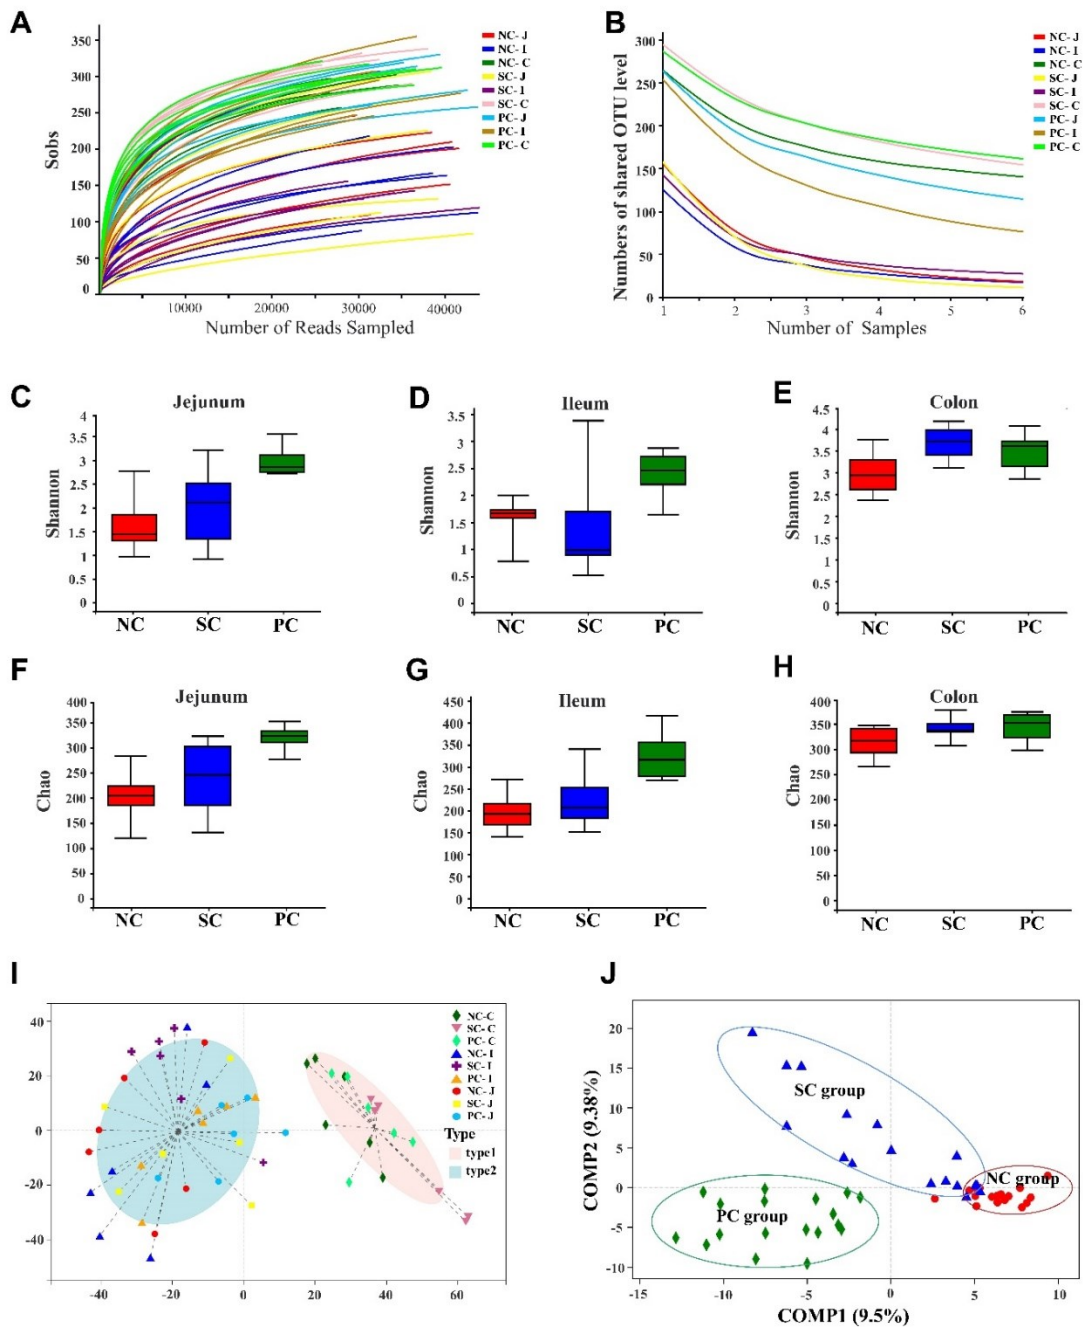

**Supplementary Figure 3.** Effects of SC treatment on the composition of jejunal microbiota in C57/BL6 mice at the phylum, family and genus levels. **(A)** Venn of the operational taxonomic units (OTUs) among different dietary treatments in the jejunum. **(B)** Distribution of jejunal bacteria at the phylum level with proportion higher than 1%. **(C)** Distribution of jejunal bacteria at the family level with proportion higher than 1%. **(D)** The distribution of the top 15 jejunal bacteria at the genus level was shown by the heatmap plot. **(E)** Wilcoxin rank-sum test bar plot on the genus level of the top 15 jejunal bacteria with significant differences between NC (basal diet), SC (basal diet with 0.5% sodium caprylate) and PC (basal diet with 0.5% sodium butyrate) dietary treatments.

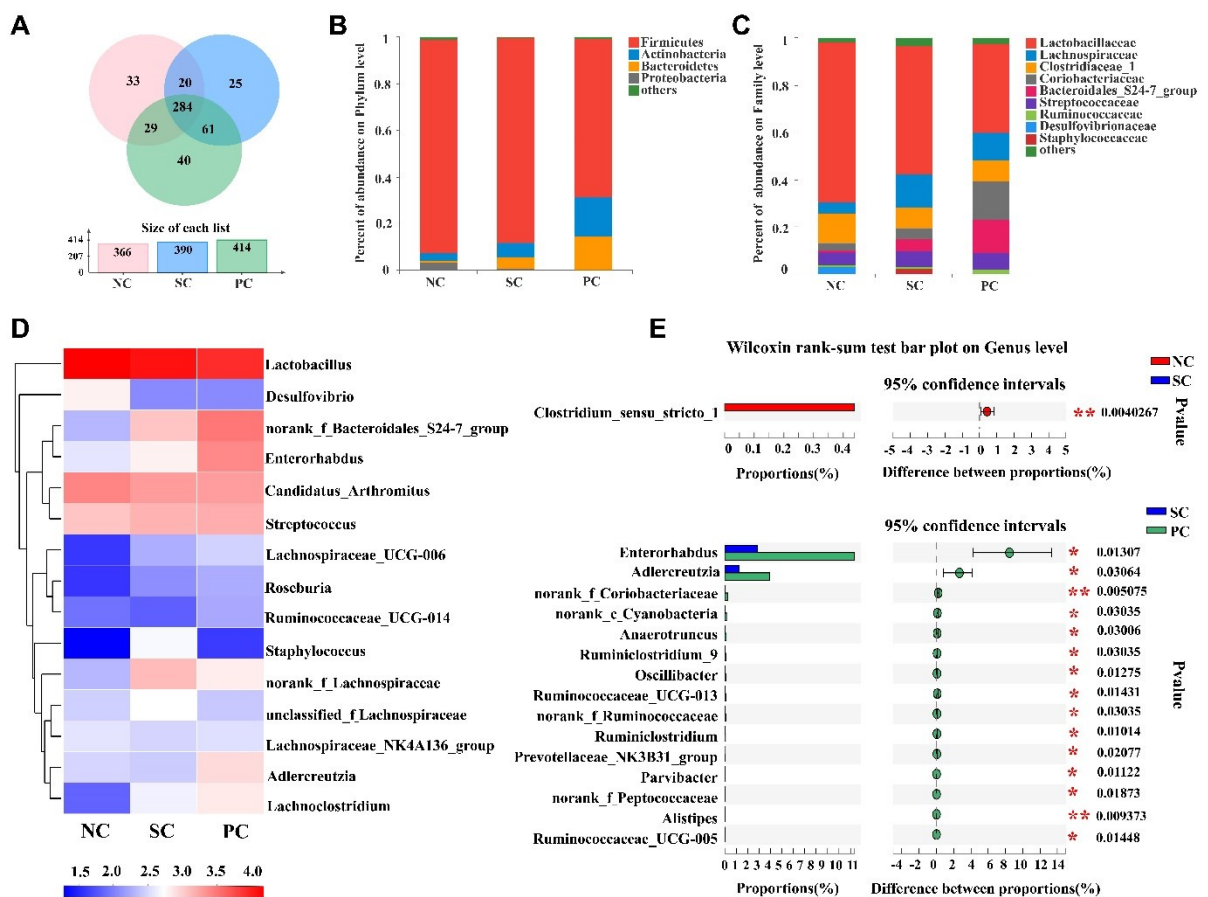

Supplement: d1fo01975a1.pdf [file d1fo01975a1.pdf]
